# Supplementary material for: DLK-dependent axonal mitochondrial fission drives degeneration after axotomy
Source: Springer Nature journal article supplement (doi:10.1038/s41467-024-54982-9), 2024-12-30

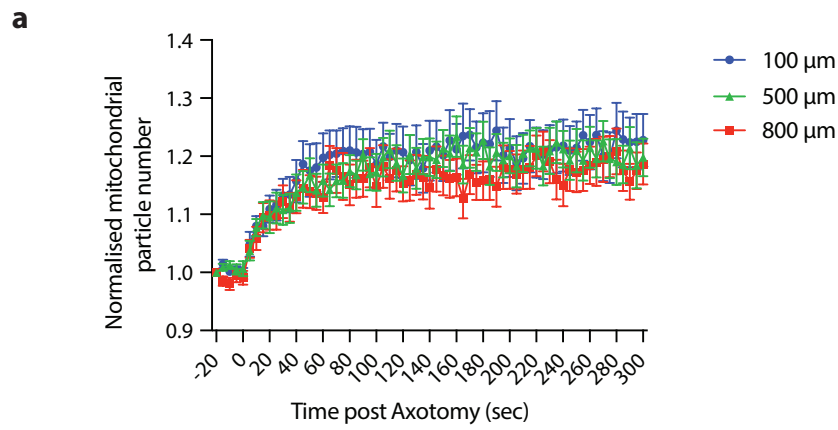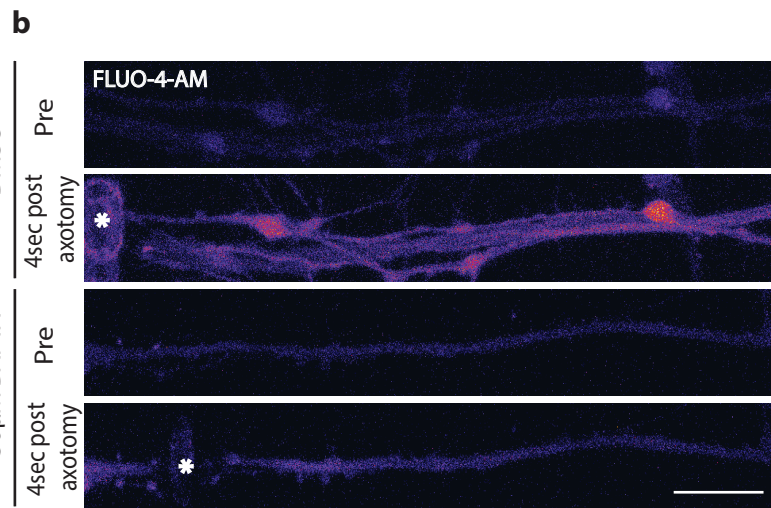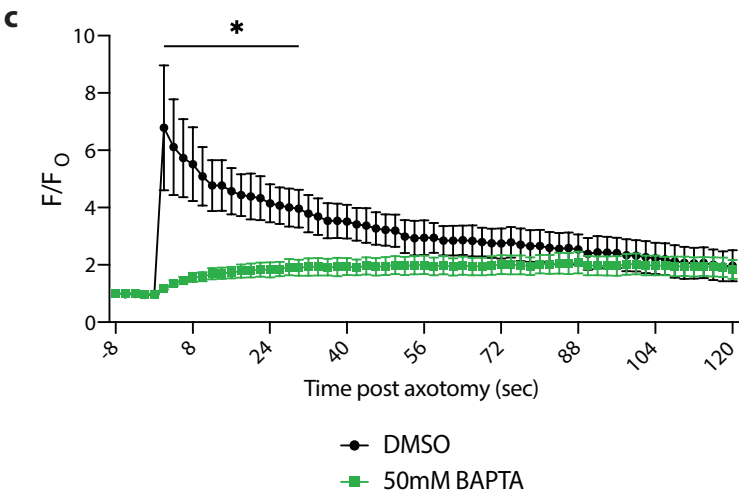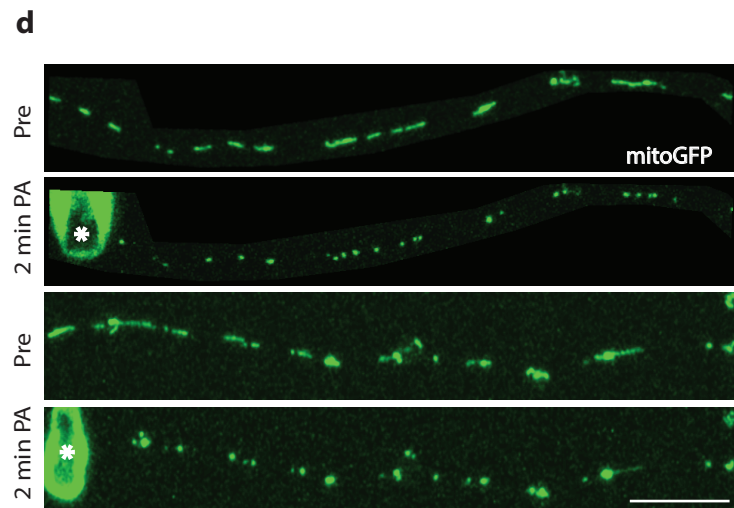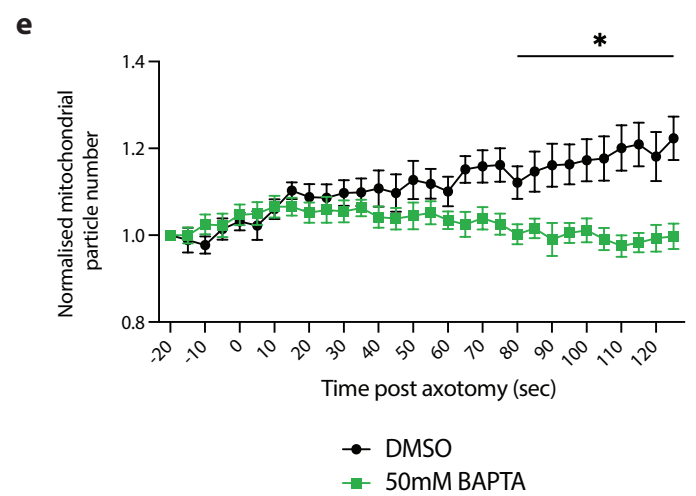

**Sup Figure 1 – Axotomy leads to calcium flooding of the axon and mitochondrial fission is Ca dependent.**

- a)** Normalized number of mitochondrial particles post axotomy in WT neurons axotomized 100 $\mu$ m (blue circle), 500 $\mu$ m (green triangle) and 800 $\mu$ m (red squares) from the soma. Results are represented as mean  $\pm$  SEM. N=3 independent differentiations, N $\geq$  30 axotomized neurons.
- b)** Representative images of Fluo-4-AM calcium imaging of injured axons pre and 4 seconds post axotomy treated with DMSO and 50  $\mu$ M BAPTA-AM. \* Marks the site of axotomy. Scale bar = 25  $\mu$ m.
- c)** Relative Fluo-4-AM fluorescence after axotomy in DMSO and BAPTA AM-treated neurons after injury. Results are represented as mean  $\pm$  SEM. N=6 cells. Two-way ANOVA, Bonferroni correction ( $p \leq 0.05$  \*).
- d)** Representative images of WT neurons transduced with mitoGFP (green) treated with DMSO and BAPTA-AM pre and 2 mins post axotomy (PA). \* Marks the site of axotomy. Scale bar = 25  $\mu$ m.
- e)** Normalized number of mitochondrial particles post axotomy in DMSO (black) and BAPTA-AM (green)-treated neurons. Results are represented as mean  $\pm$  SEM. N=2 independent differentiations, N $\geq$  16 axotomized neurons. Two-way ANOVA, Bonferroni correction ( $p \leq 0.05$  \*).

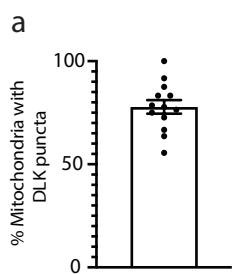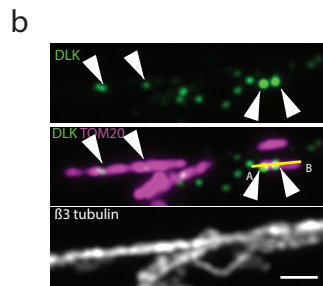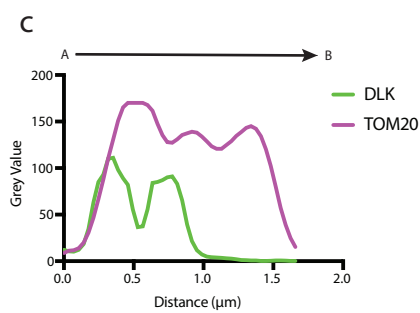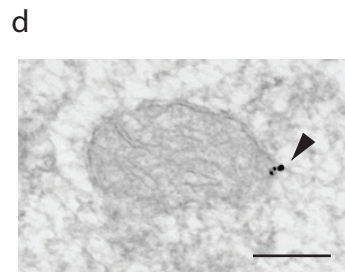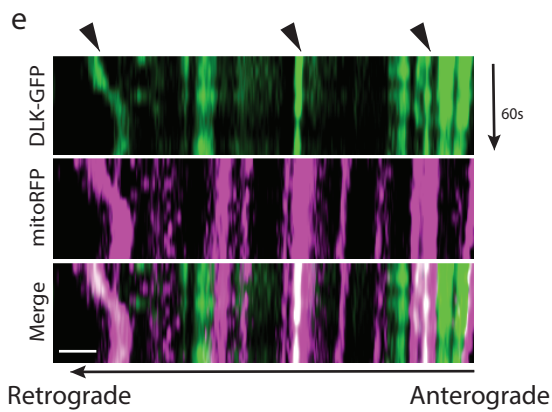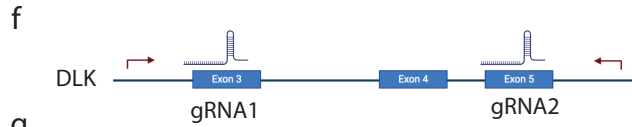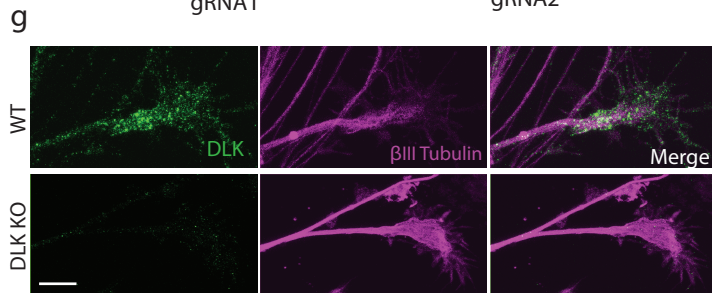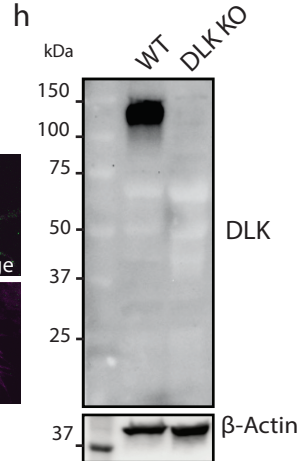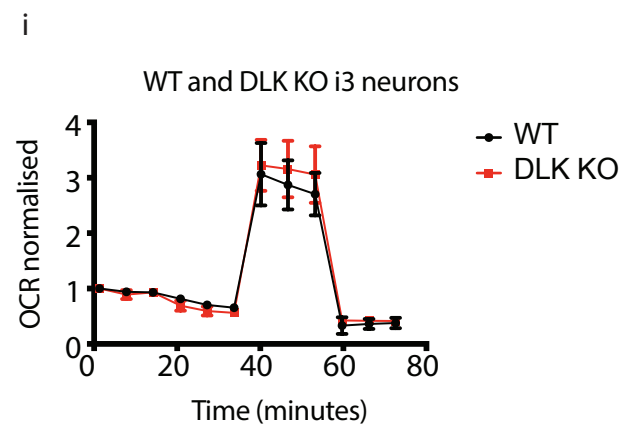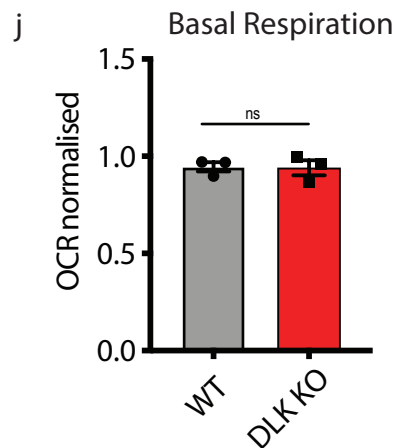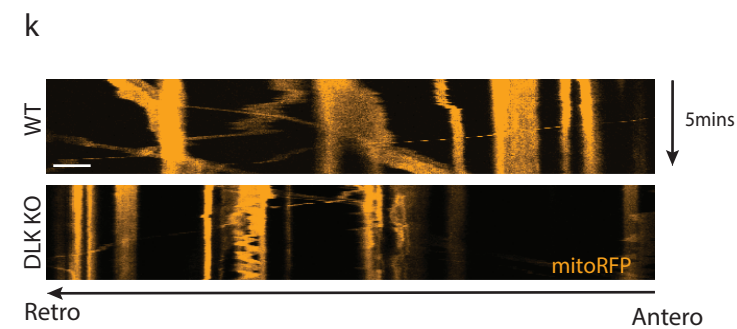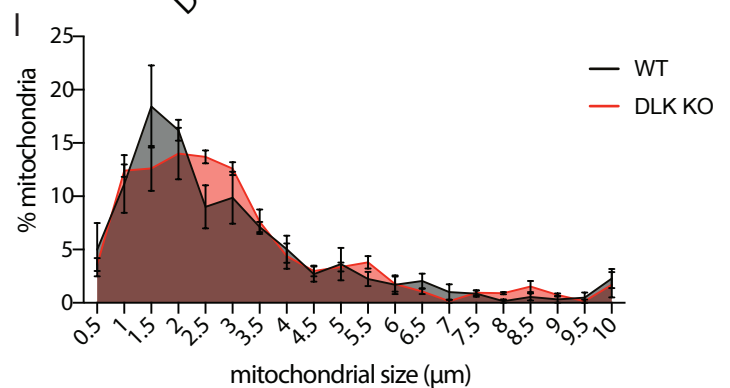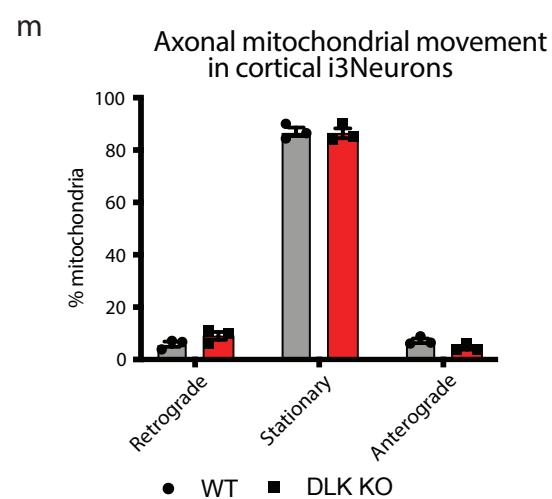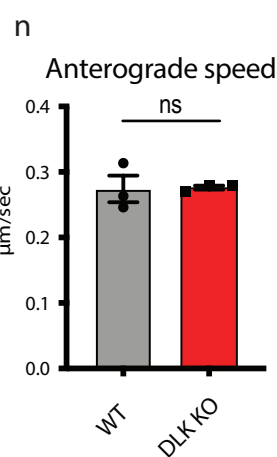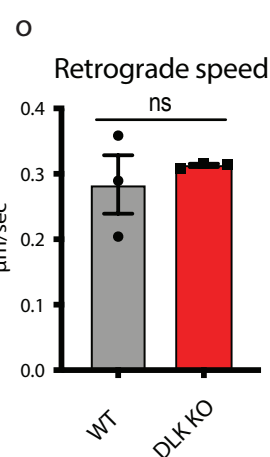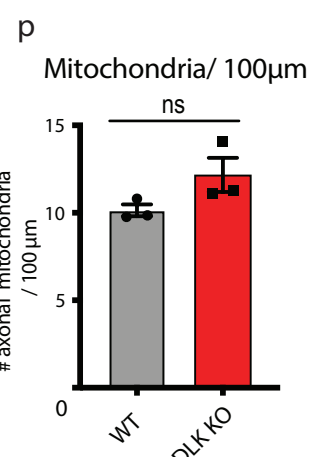

## Sup Figure 2 – DLK localizes to mitochondria in i3Neurons

- a) Quantification of percentage of axonal mitochondria containing DLK puncta. Results are represented as mean  $\pm$  SEM. N=13 axons from 3 individual differentiations.
- b) Representative high-resolution images of WT neurons axons stained with anti-DLK (green) and anti-TOM20 (magenta). Scale bar = 5  $\mu$ m.
- c) Line-scan analysis of relative fluorescence intensity from the dashed line shown in b.
- d) Immuno-EM of endogenous DLK localized in the mitochondria of i3Neurons. Arrow indicates DLK puncta. Scale bar = 5  $\mu$ m.
- e) Representative kymographs of DLK-GFP (green) and mitoRFP (magenta) co-trafficking along the axon. Scale bar = 5  $\mu$ m.
- f) Schematic representation of DLK knockout (KO) generation strategy. WT i<sup>3</sup> iPSCs were transfected with two gRNAs targeting DLK exon 3 and 5. Primers used for knockout validation are shown in red.
- g) Representative images of WT and DLK KO neurons stained with DLK (green),  $\beta$ III tubulin (magenta). Scale bar = 25  $\mu$ m.
- h) Western blots of WT and DLK KO neurons. Immunoblot for DLK and loading control  $\beta$  actin.
- i) Seahorse oxygen consumption rate (OCR) analysis of WT and DLK KO i3Neurons normalized to WT Neurons. Results are represented as mean  $\pm$  SEM. N=3 independent differentiations, 3 wells measured per condition.
- j) Basal OCR levels of WT and DLK KO neurons normalized to UT i<sup>3</sup>Neurons. Results are represented as mean  $\pm$  SEM. N=3 independent differentiations, 3 wells measured per condition. No significant changes observed (ns).
- k) Representative kymographs of WT and DLK KO axon mitochondrial (mitoRFP orange) movement. Scale bar = 5  $\mu$ m.
- l) Quantification of WT and DLK KO axon mitochondrial length. Results are represented as mean  $\pm$  SEM. N=3 independent differentiations, N $\geq$ 30 axons. No significant differences observed (ns).
- m) Quantification of percentage of stationary, retrograde and anterograde-moving mitochondria in WT and DLK KO neurons. N=3 independent differentiations, N $\geq$  30 axons. No significant differences observed (ns).
- n) Quantification of anterograde mitochondrial speed in WT and DLK KO neurons. N=3 independent differentiations, N $\geq$  30 axons. No significant differences observed (ns).
- o) Quantification of retrograde mitochondrial speed in WT and DLK KO neurons. No significant differences observed. N=3 independent differentiations, N $\geq$  30 axons. No significant differences observed (ns).
- p) Quantification of the number of mitochondria per 100  $\mu$ m in WT and DLK KO axons. No significant differences observed. N=3 independent differentiations, N $\geq$  30 axons. No significant differences observed (ns).



**a**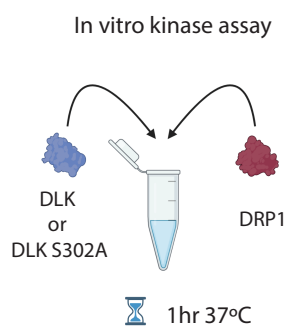**b**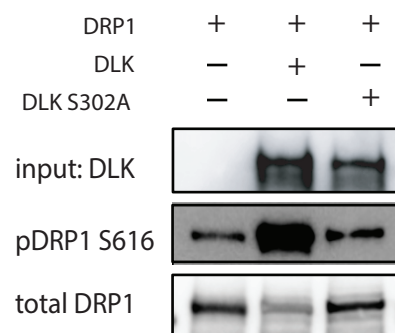**c**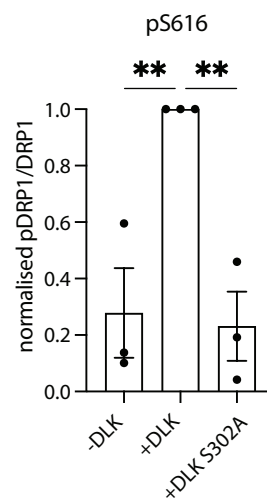**d**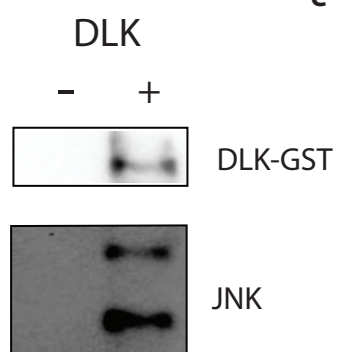**e**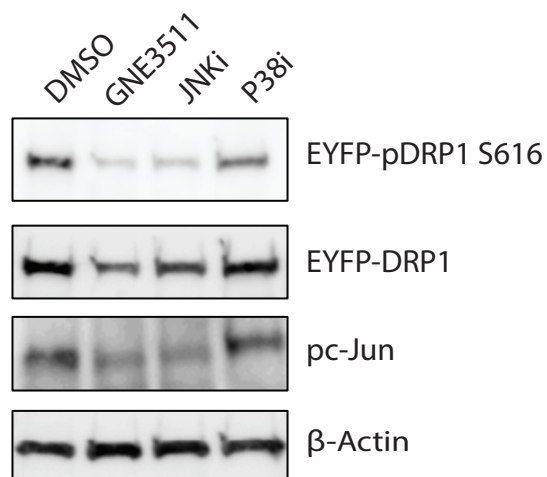**f**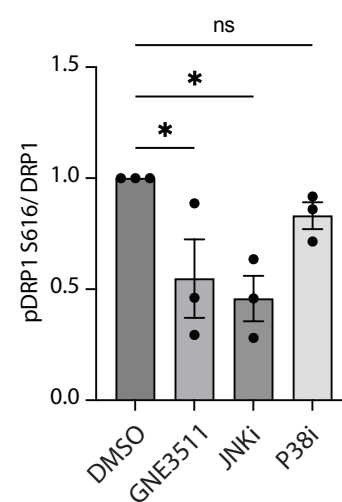

### Sup Figure 3 – the DLK/JNK pathway phosphorylates DRP1 *in vitro*

- a) Schematic representation of the *in vitro* kinase assay using purified DLK, DLK S302A and DRP1 to test the direct phosphorylation of DRP1 by DLK.
- b) Representative western blots of *In vitro* kinase assay utilizing separately purified DRP1, WT DLK and kinase dead DLK S302A. Representative immunoblots for pS616-DRP1, total DRP1 and DLK
- c) Quantification of Quantification of pS616-DRP1/total DRP1 in an *in vitro* kinase assay. Results are represented as mean  $\pm$  SEM. One-way ANOVA, Bonferroni correction ( $p \leq 0.01$  \*\*).
- d) Representative western blot of JNK co-precipitating with purified DLK-GST in HEK-293T cells. Immunoblots for total DLK and JNK.
- e) Representative western blots of HEK293A cells transfected for 24 hours with DLK-GFP and EYFP-DRP1 and treated with DMSO, GNE-3511, JNKi and P38i. Immunoblot for pS616-DRP1, total DRP1, pS63-cJun and loading control  $\beta$  actin.
- f) Quantification of pS616-DRP1/total DRP1 levels after 24-hour expression of DLK-GFP and EYFP-DRP1 treated with DMSO, GNE-3511, JNKi and P38i. Results are represented as mean  $\pm$  SEM. One-way ANOVA, Bonferroni correction (not significant (ns),  $p \leq 0.05$  \*).

Supplementary Figure 4

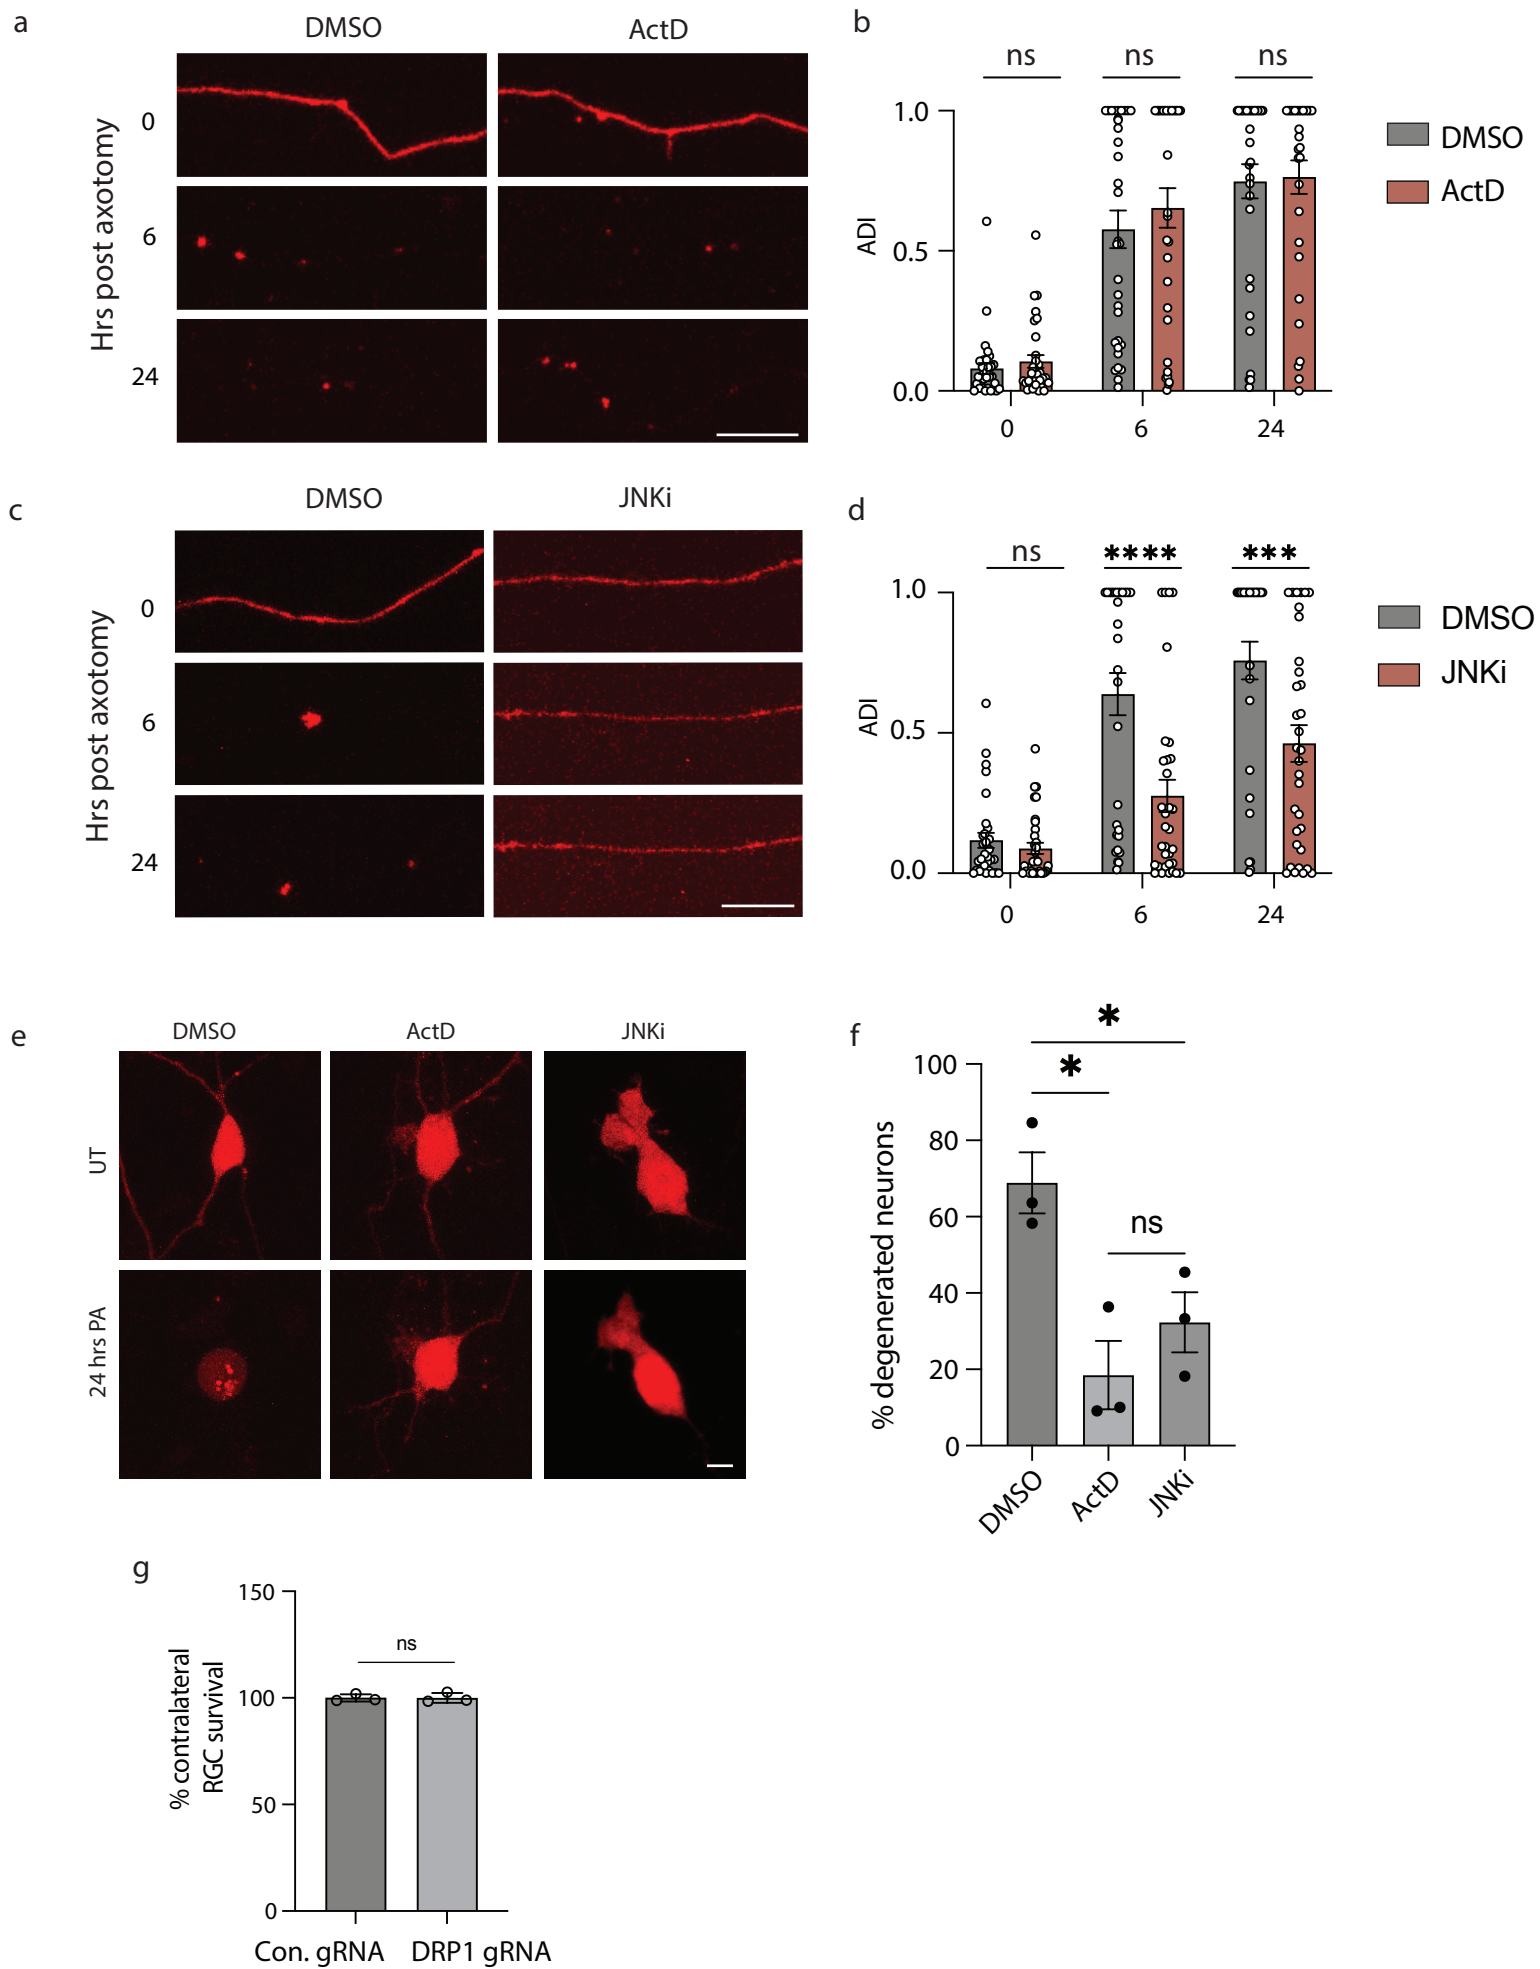

**Sup Figure 4 – Effect of blocking transcription and JNK on cell death and axon degeneration after axotomy**

- a) Representative images of neuron axons treated with DMSO or Actinomycin D (ActD) transduced with cyto mApple (red) proximal to the site of injury 0, 6 and 24 hours post axotomy. Scale bar = 25  $\mu$ m.
- b) Quantification of axon degeneration index (ADI) in neurons treated with DMSO or Actinomycin D (ActD) 0, 4, 8 and 24 hours post axotomy. Results are represented as mean  $\pm$  SEM. N=3 independent differentiations, N $\geq$  32 axons. Two-way ANOVA, Bonferroni correction (not significant, ns).
- c) Representative images of neuron axons treated with DMSO or JNKi transduced with cyto mApple (red) proximal to the site of injury 0, 4, 8 and 24 hours post axotomy. Scale bar = 25  $\mu$ m.
- d) Quantification of axon degeneration index (ADI) in neurons treated with DMSO or JNKi 0, 4, 8 and 24 hours post axotomy. Results are represented as mean  $\pm$  SEM. N=3 independent differentiations, N $\geq$  31 axons. Two-way ANOVA, Bonferroni correction ( $p \leq 0.005$  \*\*\*,  $p \leq 0.001$  \*\*\*\*).
- e) Representative images of neuron cell bodies transduced with cyto mApple (red) treated with DMSO, Actinomycin D (ActD) and JNKi pre and 24 hours post axotomy (PA). Scale bar = 40  $\mu$ m.
- f) Percentage degenerated neurons treated with DMSO, Actinomycin D (ActD) and JNKi 24 hours post axotomy. Results are represented as mean  $\pm$  SEM. N=3 independent differentiations. Unpaired t-test (not significant, ns.  $p \leq 0.05$  \*).
- g) Quantification of percentage RBPMS-positive RGCs in the retinas of contralateral control and DRP1 gRNA mice at 7DPI (normalized to Control gRNA). N=3 mice per condition. not significant, ns.

## Uncropped western blots

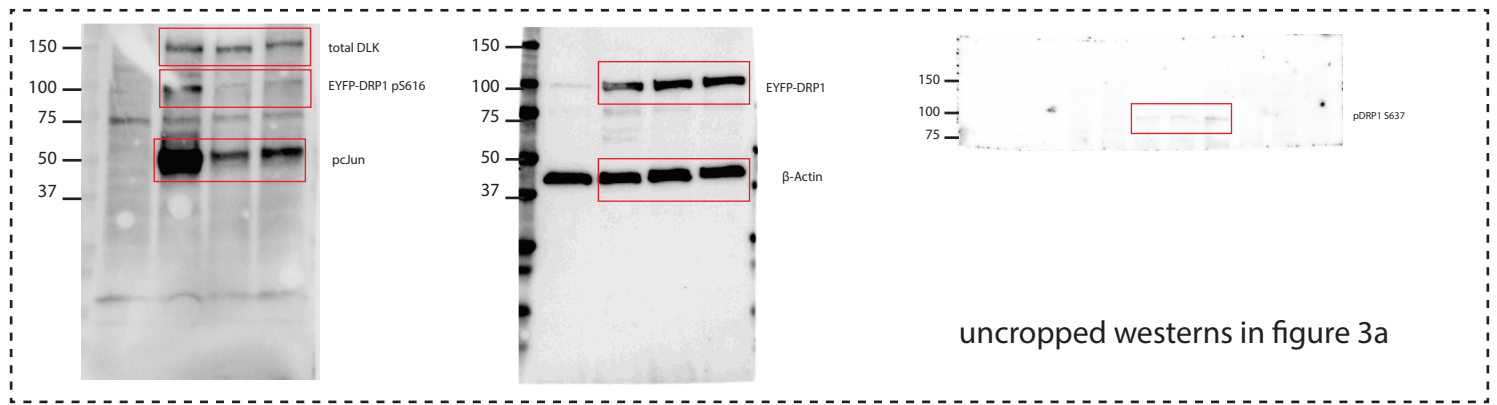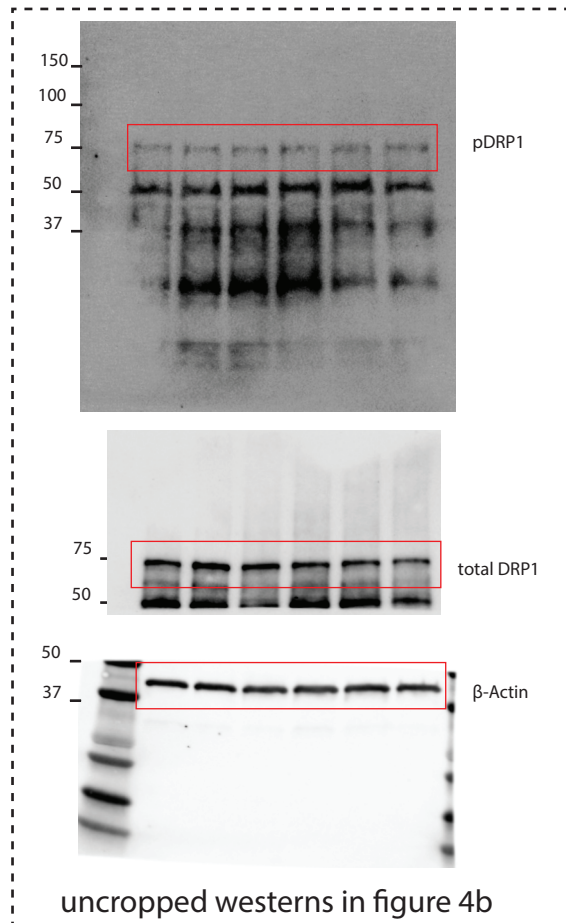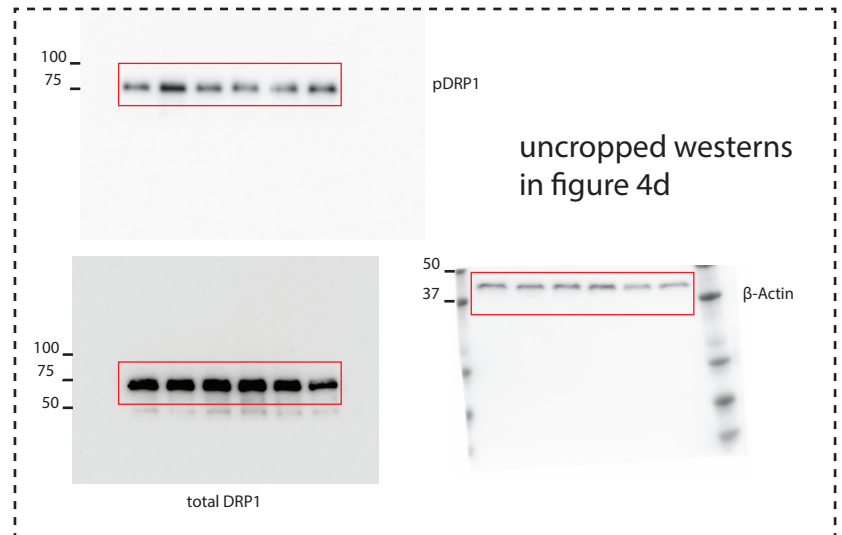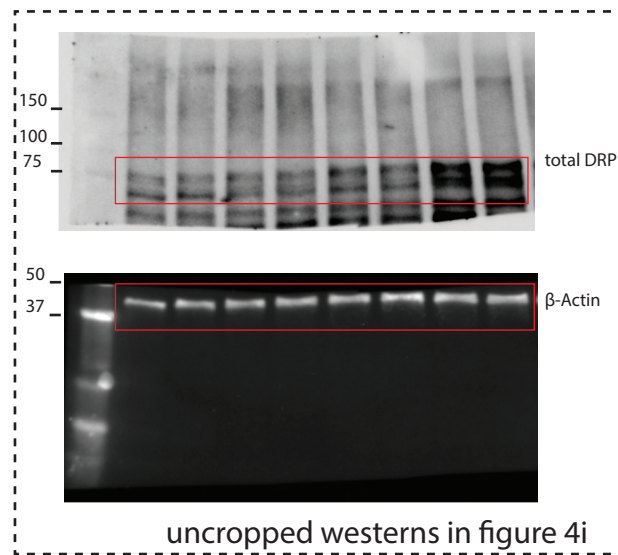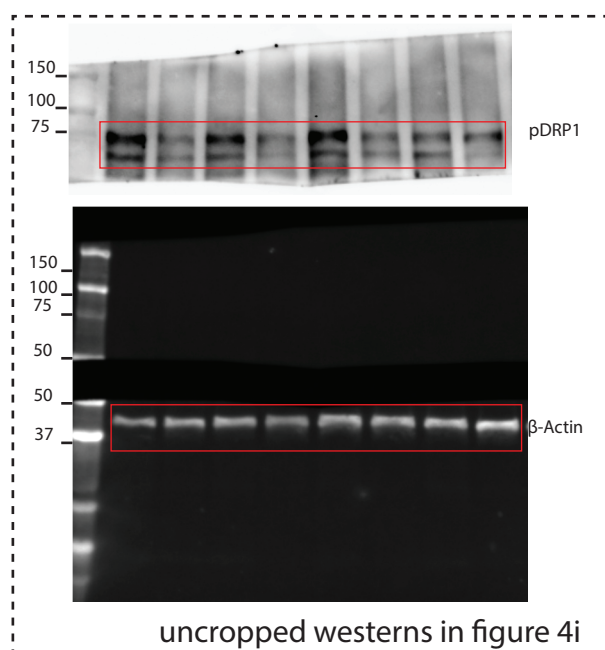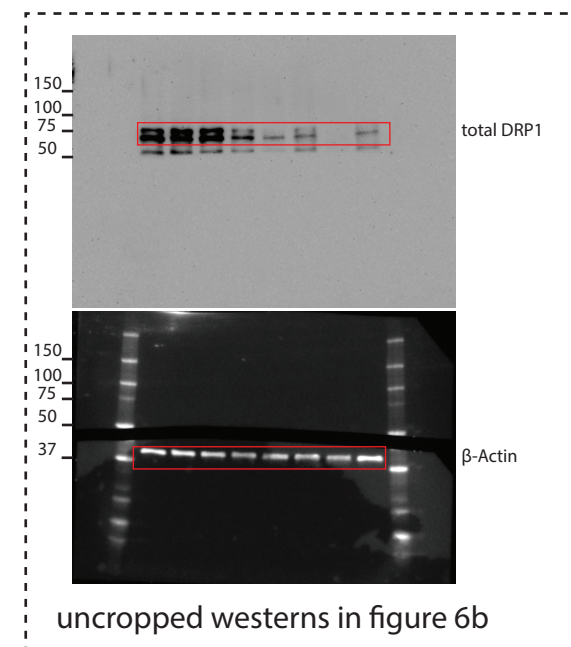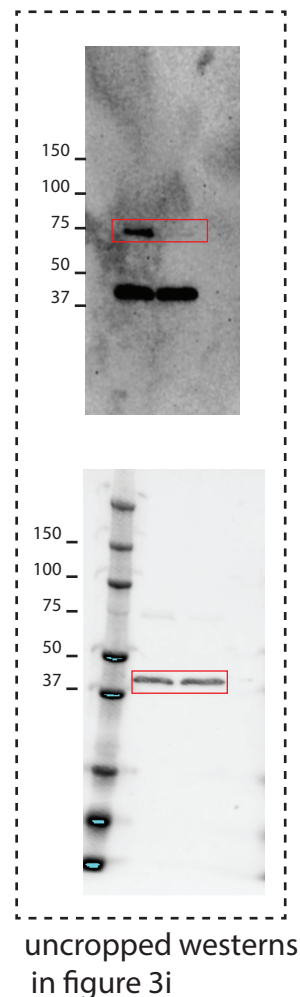



# Uncropped western blots

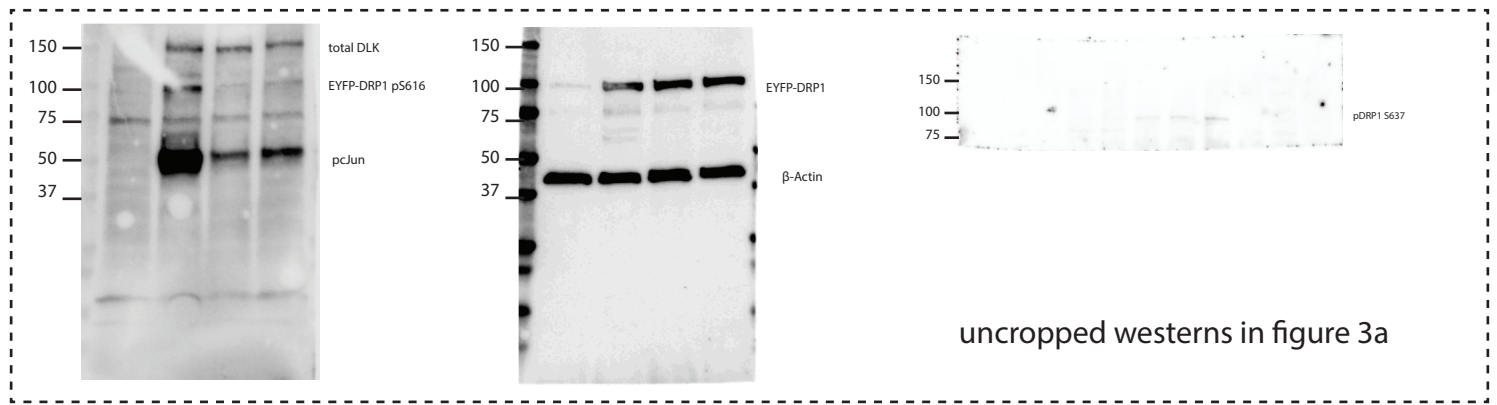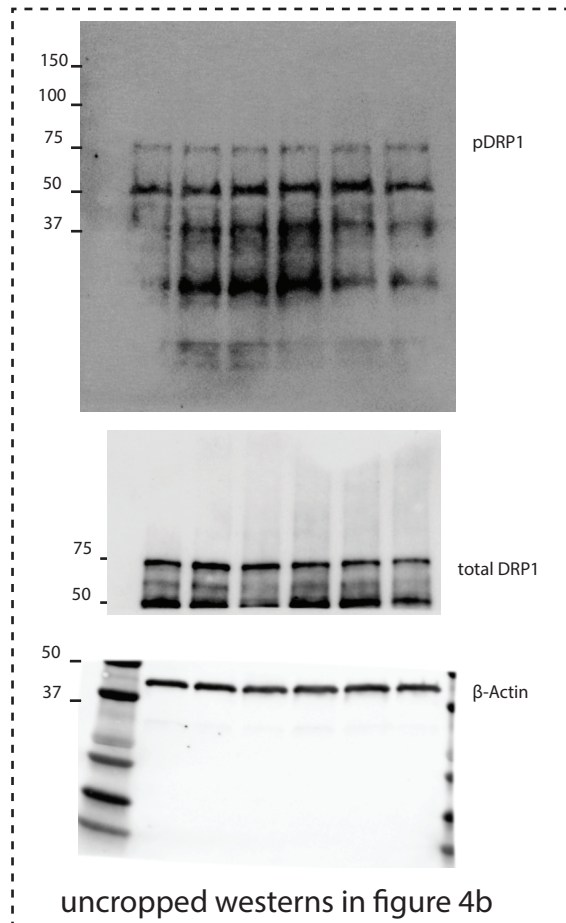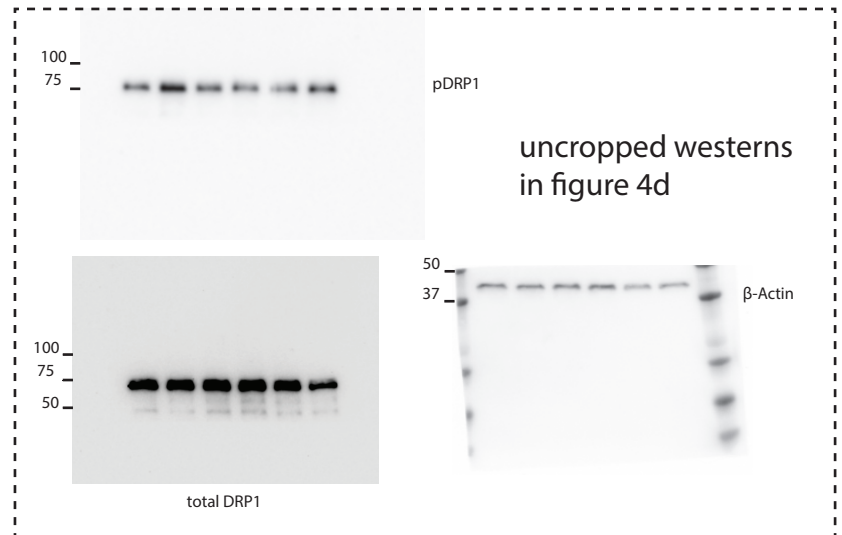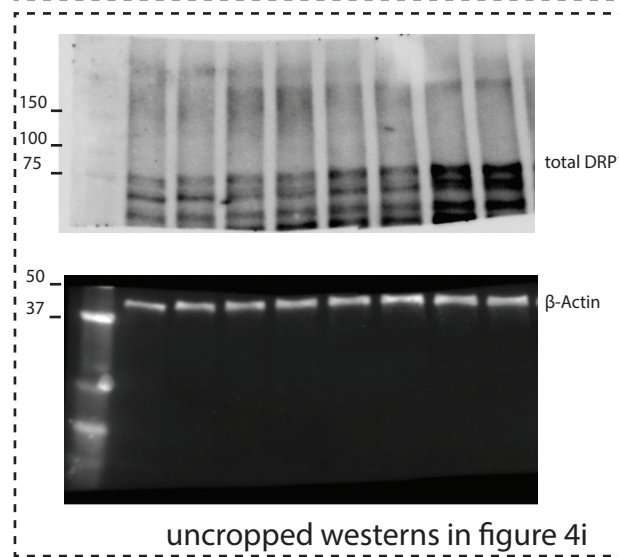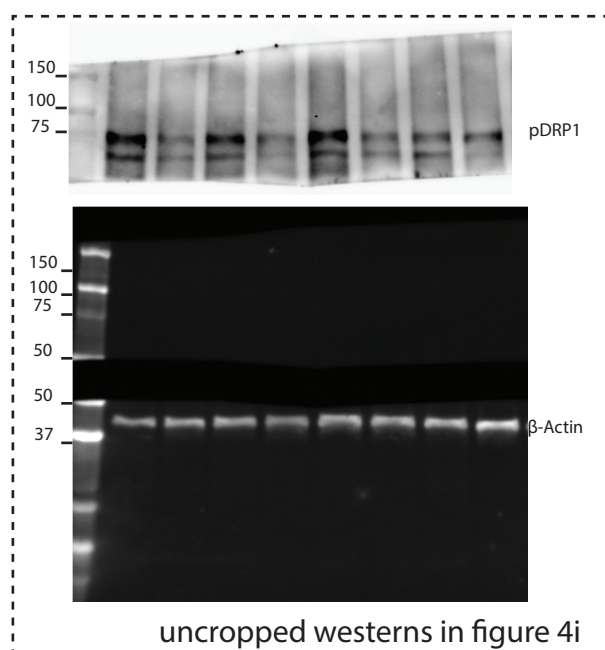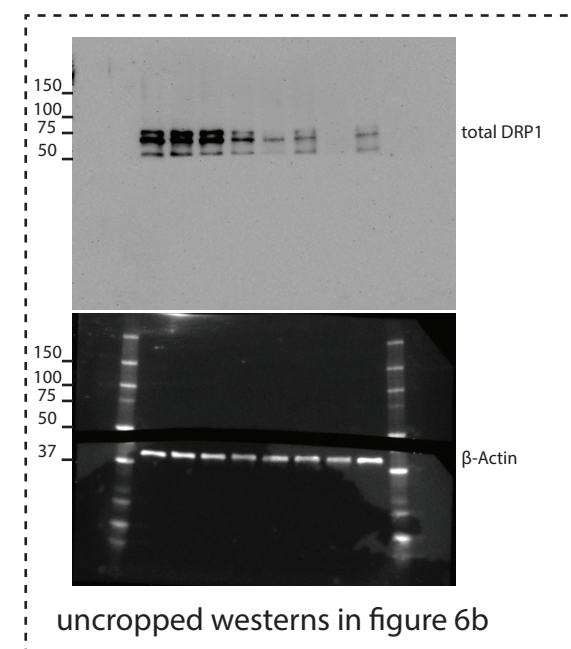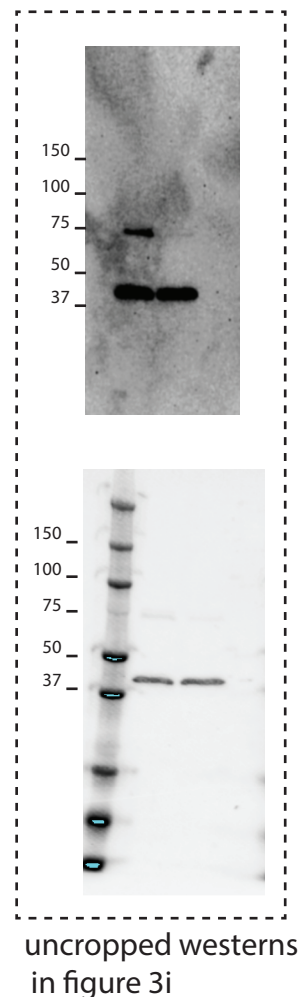

Supplement: MOESM1 [file 41467_2024_54982_MOESM1_ESM.pdf]
